# Supplementary material
Source: MDPI journal article supplement (https://www.mdpi.com/1424-2818/14/12/1039)
Supplement: s1 [file s1]

---

## SUPPLEMENTARY INFORMATION

# Nematode and acanthocephalan parasites of confiscated Sunda pangolins, *Manis javanica* Desmarest, 1822 (Mammalia: Pholidota: Manidae), with an updated list of the parasites of pangolins

Diane P. Barton<sup>1\*</sup>, Paolo Martelli<sup>2</sup>, Brian M. Worthington<sup>3</sup>, Tommy T.-Y. Lam<sup>3</sup>, Xiaocheng Zhu<sup>4</sup> and Shokoofeh Shamsi<sup>1</sup>

<sup>1</sup> School of Agricultural, Environmental and Veterinary Sciences, Charles Sturt University, Wagga Wagga, New South Wales, 2678 Australia

<sup>2</sup> Veterinary Services, Ocean Park Corporation, 180 Wong Chuk Hang Road, Aberdeen, Hong Kong SAR, China

<sup>3</sup> State Key Laboratory of Emerging Infectious Diseases, School of Public Health, The University of Hong Kong, Hong Kong SAR, China

<sup>4</sup> NSW Department of Primary Industries, Wagga Wagga Agricultural Institute, Wagga Wagga, New South Wales, 2650 Australia

\* Correspondence: dibarton@csu.edu.au

Table S1. List of synonyms of parasite names mentioned in the text. Original parasite names are listed alphabetically.

| Original Parasite Name                                                                          | Current Parasite Name               |
|-------------------------------------------------------------------------------------------------|-------------------------------------|
| ? <i>Ascaris manidis</i> Diesing, 1851                                                          | <i>Gendrespirura zschokkei</i>      |
| <i>Chenofilaria filaria</i> Kou, 1958                                                           | <i>Acanthocheilonema fausti</i>     |
| <i>Davainea contorta</i> Zschokke, 1895                                                         | <i>Diorchiraillietina contorta</i>  |
| <i>Diorchiraillietina rahmi</i> (Baer & Fain, 1956)                                             | <i>Manitaurus rahmi</i>             |
| <i>Dipetalonema fausti</i> Esslinger, 1966                                                      | <i>Acanthocheilonema fausti</i>     |
| <i>Filaria zschokkei</i> Meyer, 1896                                                            | <i>Gendrespirura zschokkei</i>      |
| <i>Habronema congolense</i> Vuylsleke, 1937                                                     | <i>Gendrespirura hamospiculata</i>  |
| <i>Habronema hamospiculatum</i> (Neveu-Lemaire, 1927) <i>sensu</i> Hsu, 1932                    | <i>Gendrespirura zschokkei</i>      |
| <i>Habronema manidis</i> (Whitfield, 1851) <i>sensu</i> Seurat, 1920                            | <i>Gendrespirura hamospiculata</i>  |
| <i>Habronema manidis</i> sp. n. <i>sensu</i> Vuylsleke, 1936                                    | <i>Gendrespirura hamospiculata</i>  |
| <i>Manistrongylus manidis</i> Baer, 1959                                                        | <i>Trichocheenia manidis</i>        |
| <i>Manistrongylus meyeri</i> (Meyer, 1896)                                                      | <i>Trichocheenia meyeri</i>         |
| <i>Pholidostrongylus armatus</i> Baer, 1959                                                     | <i>Trichocheenia armata</i>         |
| <i>Protospirura hamospiculata</i> Neveu-Lemaire, 1927                                           | <i>Gendrespirura hamospiculata</i>  |
| <i>Raillietina anoplocephaloides</i> Baer & Fain, 1956                                          | <i>Baerfainia anoplocephaloides</i> |
| <i>Raillietina contorta</i> (Zschokke, 1895)                                                    | <i>Diorchiraillietina contorta</i>  |
| <i>Raillietina rahmi</i> Baer & Fain, 1956                                                      | <i>Manitaurus rahmi</i>             |
| <i>Spiroptera orca</i> von Linstow, 1906                                                        | <i>Gendrespirura zschokkei</i>      |
| <i>Spiroptera orca</i> von Linstow, 1906 <i>sensu</i> Monnig, 1924 <i>nec</i> von Linstow, 1906 | <i>Gendrespirura hamospiculata</i>  |
| <i>Strongylus costatus</i> Meyer, 1896                                                          | <i>Trichocheenia meyeri</i>         |
| <i>Trichoskrjabinia costata</i> (Meyer, 1896)                                                   | <i>Trichocheenia meyeri</i>         |
